# Supplementary material
Source: PubMed Central journal article supplement (PMC5332162)
Supplement: NIHMS847094-supplement-01.pdf [file NIHMS847094-supplement-01.pdf]

**Table S1.** Site-Specific and Mean Sample Demographics and Characteristics

|                                          | <b>Boston site<br/>(n=180; 60<br/>trios)</b> | <b>Vancouver site<br/>(n=174; 58<br/>trios)</b> | <b>t/<math>\chi^2</math><br/>value</b> | <b>p<br/>value</b> | <b>Total sample<br/>(n = 354; 118<br/>trios)</b> |
|------------------------------------------|----------------------------------------------|-------------------------------------------------|----------------------------------------|--------------------|--------------------------------------------------|
| Age at ascertainment, mean (SD)          | 14.2y (2.97)                                 | 14.0y (3.01)                                    | 0.295                                  | .770               | 14.1y (2.98)                                     |
| Age of OCD onset, mean (SD) <sup>a</sup> | 8.32y (3.08)                                 | 8.42y (3.64)                                    | 0.150                                  | .881               | 8.37y (3.35)                                     |
| Age at worst OCD, mean (SD) <sup>a</sup> | 11.64y (3.29)                                | 12.52y (3.06)                                   | 1.50                                   | .137               | 12.1y (3.20)                                     |
| Sex, % Male                              | 60.7 (n=34)                                  | 50.0 (n=29)                                     | 1.32                                   | .250               | 55.3 (n=63)                                      |
| Lifetime comorbidity, %                  | 77.1 (n=37)                                  | 69.0 (n=40)                                     | 0.87                                   | .351               | 72.6 (n=77)                                      |
| CGI-Severity, mean (SD)                  | 3.45 (1.33)                                  | 4.31 (1.23)                                     | 2.83                                   | .006               | 3.78 (1.35)                                      |
| CYBOCS total, mean (SD)                  | 29.04 (5.79)                                 | 21.64 (8.67)                                    | 5.10                                   | <.001*             | 25.13 (8.29)                                     |
| Obsession total score, mean (SD)         | 14.58 (3.46)                                 | 10.46 (4.28)                                    | 5.40                                   | <.001*             | 12.41 (4.41)                                     |
| Compulsion total score, mean (SD)        | 14.46 (3.07)                                 | 11.18 (4.74)                                    | 4.17                                   | <.001*             | 12.73 (4.35)                                     |
| FAS total score, mean (SD)               | -                                            | 19.09 (12.9)                                    | -                                      | -                  | -                                                |
| CDI total, mean (SD)                     | -                                            | 14.64 (10.9)                                    | -                                      | -                  | -                                                |
| Intact families, %                       | -                                            | 82.1 (n=46)                                     | -                                      | -                  | -                                                |
| <b>OFF-scale reports</b>                 |                                              |                                                 |                                        |                    |                                                  |
| Age of OCD onset, mean (SD) <sup>a</sup> | 8.32y (3.08)                                 | 8.42y (3.64)                                    | 0.150                                  | .881               | 8.37y (3.35)                                     |
| Age at worst OCD, mean (SD) <sup>a</sup> | 11.64y (3.29)                                | 12.52y (3.06)                                   | 1.50                                   | .137               | 12.1y (3.20)                                     |
| Score on OFF Part 1 (0-63) <sup>a</sup>  |                                              |                                                 |                                        |                    |                                                  |
| Current OCD, mean (SD)                   | 20.1 (13.5)                                  | 27.1 (12.3)                                     | 2.94                                   | .004*              | 23.6 (13.3)                                      |
| Worst ever OCD, mean (SD)                | 37.3 (11.7)                                  | 33.2 (11.8)                                     | 1.87                                   | .064               | 35.3 (11.9)                                      |
| Household composition                    |                                              |                                                 |                                        |                    |                                                  |
| Living with mother, % <sup>b</sup>       | 98.3 (n=59)                                  | 100.0 (n=58)                                    | 0.975                                  | .323               | 99.2 (n=117)                                     |
| Living with father, %                    | 93.3 (n=56)                                  | 98.3 (n=57)                                     | 1.780                                  | .183               | 95.8 (n=113)                                     |
| Living with sibling(s), %                | 86.7 (n=52)                                  | 74.1 (n=43)                                     | 2.950                                  | .086               | 80.5 (n=95)                                      |
| Living alone, %                          | 0 (n=0)                                      | 0 (n=0)                                         | -                                      | -                  | 0 (n=0)                                          |
| Family history of OCD                    |                                              |                                                 |                                        |                    |                                                  |
| Diagnosed in mother, %                   | 6.7 (n=4)                                    | 3.5 (n=2)                                       | 0.667                                  | .414               | 5.1 (n=6)                                        |
| Suspected in mother, %                   | 16.7 (n=10)                                  | 15.5 (n=9)                                      | 0.143                                  | .705               | 16.1 (n=19)                                      |
| Diagnosed in father, %                   | 13.3 (n=8)                                   | 6.9 (n=4)                                       | 1.411                                  | .235               | 10.2 (n=12)                                      |
| Suspected in father, %                   | 31.7 (n=19)                                  | 24.1 (n=14)                                     | 1.479                                  | .224               | 28.0 (n=33)                                      |
| Diagnosed in sibling(s), %               | 5.0 (n=3)                                    | 6.9 (n=4)                                       | 0.171                                  | .680               | 5.9 (n=7)                                        |

|                                   |             |             |       |        |             |
|-----------------------------------|-------------|-------------|-------|--------|-------------|
| Suspected in sibling(s), %        | 15.0 (n=9)  | 8.6 (n=5)   | 1.559 | .212   | 11.9 (n=14) |
| Diagnosed in extended family, %   | 15.0 (n=9)  | 17.2 (n=10) | 0.085 | .771   | 16.1 (n=19) |
| Suspected in extended family, %   | 36.7 (n=22) | 44.8 (n=26) | 0.269 | .604   | 40.7 (n=48) |
| Treatment history                 |             |             |       |        |             |
| Previous medications, %           | 88.3 (n=53) | 56.9 (n=33) | 13.90 | <.001* | 72.9 (n=86) |
| 'Talk' therapy (psychotherapy), % | 80 (n=48)   | 13.8 (n=8)  | 41.95 | <.001* | 47.5 (n=56) |
| Behavioral therapy, %             | 83.3 (n=50) | 17.2 (n=10) | 49.73 | <.001* | 50.9 (n=60) |
| Family therapy, %                 | 31.7 (n=19) | 6.9 (n=4)   | 10.96 | .001*  | 19.5 (n=23) |
| No previous treatment, %          | 3.3 (n=2)   | 24.1 (n=14) | 11.16 | .001*  | 13.6 (n=16) |

Note: CDI = Child Depression Inventory; CGI = Clinical Global Impression; CY-BOCS = Children's Yale-Brown Obsessive-Compulsive Scale; FAS = Family Accommodation Scale; OCD = obsessive-compulsive disorder; OFF = OCD Family Functioning Scale.

<sup>a</sup> Reported values are the mean of youth (self), mother and father reports

<sup>b</sup> Reported percentages are the percentage of sample excluding missing values

\* Statistically significant difference ( $\alpha = 0.05$ ) between Boston and Vancouver site

**Table S2.** Obsessive-Compulsive Disorder (OCD) Family Functioning (OFF) Subscale Scores as Reported by Affected Youth, Mothers, and Fathers

| OFF Scale Items                                      | At Worst Ever OCD |                  |                  |                  |       |                      | At Current OCD   |                  |                  |                  |       |                      |
|------------------------------------------------------|-------------------|------------------|------------------|------------------|-------|----------------------|------------------|------------------|------------------|------------------|-------|----------------------|
|                                                      | Mean (SD)         |                  |                  | df<br>(error)    | F     | p                    | Mean (SD)        |                  |                  | df<br>(error)    | F     | p                    |
|                                                      | Patient           | Mother           | Father           |                  |       |                      | Patient          | Mother           | Father           |                  |       |                      |
| <b>Part 1: Family functioning Impairment (0-63)</b>  | 37.98<br>(15.37)  | 38.04<br>(15.26) | 34.52<br>(15.38) | 1.92<br>(214.5)  | 3.58  | .032 <sup>c</sup>    | 26.24<br>(16.63) | 24.84<br>(16.31) | 23.15<br>(15.58) | 1.88<br>(218.0)  | 2.64  | .08                  |
| Routine Tasks (0-33)                                 | 17.46<br>(9.10)   | 18.67<br>(8.89)  | 17.05<br>(8.79)  | 1.91<br>(210.14) | 1.95  | .15                  | 11.25<br>(8.90)  | 11.36<br>(8.57)  | 11.02<br>(8.17)  | 1.90<br>(218.53) | 0.11  | .88                  |
| Social Life (0-9)                                    | 6.89<br>(2.90)    | 6.22<br>(3.02)   | 5.89<br>(3.00)   | 2<br>(212)       | 5.00  | .008 <sup>b</sup>    | 4.94<br>(3.36)   | 4.10<br>(3.17)   | 3.94<br>(3.21)   | 1.87<br>(208.06) | 5.75  | .004 <sup>a,b</sup>  |
| Work/School Performance (0-9)                        | 6.21<br>(2.71)    | 5.80<br>(2.93)   | 5.42<br>(2.84)   | 2<br>(214)       | 3.56  | .03 <sup>b</sup>     | 4.42<br>(3.18)   | 3.72<br>(3.14)   | 3.56<br>(3.12)   | 2<br>(226)       | 5.53  | .005 <sup>a,b</sup>  |
| Emotional (0-12)                                     | 8.02<br>(3.24)    | 7.58<br>(3.01)   | 6.43<br>(2.92)   | 2<br>(218)       | 10.66 | <.001 <sup>b,c</sup> | 5.88<br>(3.54)   | 5.60<br>(3.22)   | 4.57<br>(2.96)   | 2<br>(232)       | 9.12  | <.001 <sup>b,c</sup> |
| <b>Part 2: Symptom-specific impairment (0-32)</b>    | 18.65<br>(7.41)   | 17.19<br>(7.13)  | 17.35<br>(7.56)  | 2<br>(200)       | 1.72  | .18                  | 16.82<br>(7.54)  | 15.89<br>(7.71)  | 15.58<br>(7.44)  | 2<br>(188)       | 1.09  | .34                  |
| <b>Part 3: Family role-specific impairment (0-5)</b> | 1.95<br>(0.69)    | 3.17<br>(1.19)   | 2.89<br>(1.25)   | 2<br>(128)       | 28.96 | <.001 <sup>a,b</sup> | 2.00<br>(0.82)   | 3.14<br>(1.23)   | 2.84<br>(1.35)   | 2<br>(100)       | 15.62 | <.001 <sup>a,b</sup> |

Note: Boldface indicates a statistically significant omnibus difference ( $\alpha = 0.05$ ) across the respondent groups. Omnibus  $p$  values calculated via repeated measures analysis of variance, and pair-wise differences calculated via paired t-testing. OCD = obsessive-compulsive disorder.

<sup>a</sup> Statistically significant exploratory pairwise difference ( $p < .05$ ) between patient and mother.

<sup>b</sup> Statistically significant exploratory pairwise difference ( $p < .05$ ) between patient and father.

<sup>c</sup> Statistically significant exploratory pairwise difference ( $p < .05$ ) between mother and father.

**Table S3.** Prevalence of Symptom-Specific Family Impairment<sup>a</sup>

| <b>Symptom Type</b>      | <b>Worst Ever OCD</b> |                        |
|--------------------------|-----------------------|------------------------|
|                          | <b>(%)</b>            | <b>Current OCD (%)</b> |
| Cleaning compulsions     | 63.4                  | 54.4                   |
| Contamination obsessions | 64.7                  | 52.7                   |
| Hoarding                 | 45.8                  | 39.9                   |
| Scrupulosity obsessions  | 56.2                  | 47.5                   |
| Intrusive obsessions     | 82.5                  | 68.2                   |
| Perfectionism            | 73.5                  | 62.8                   |
| Symmetry obsessions      | 54.1                  | 44.0                   |
| Ordering compulsions     | 43.7                  | 39.3                   |
| Repeating compulsions    | 67.7                  | 56.8                   |
| Checking compulsions     | 68.7                  | 56.6                   |
| Counting compulsions     | 47.3                  | 39.2                   |
| Religious obsessions     | 24.1                  | 20.4                   |
| Somatic obsessions       | 67.9                  | 57.6                   |
| Sexual obsessions        | 22.8                  | 19.5                   |
| 'Just right' obsessions  | 80.1                  | 69.1                   |
| Slowness                 | 56.5                  | 48.1                   |

Note: no significant score differences were identified across youth, mother, and father groups for this subscale total (see Table 1,  $p \geq .18$ ). OCD = obsessive-compulsive disorder.

<sup>a</sup> Percentages represent proportion of total respondents who answered “A Little,” “Often,” or “Always.”
